# Supplementary material for: A DNA-based optical force sensor for live-cell applications
Source: bioRxiv or medRxiv preprint supplement (doi:10.1101/2021.12.21.473677), 2021-12-24
Supplement: Supplementary file [file media-1.pdf]

# Supporting Information: A DNA-based optical force sensor for live-cell applications

Christina Jayachandran<sup>1,2,†</sup>, Arindam Ghosh<sup>1,3,†</sup>, Meenakshi Prabhune<sup>1,4</sup>, Jonathan Bath<sup>5,6</sup>, Andrew J. Turberfield<sup>5,6</sup>, Lara Hauke<sup>1,7</sup>, Jörg Enderlein<sup>1,8</sup>, Florian Rehfeldt<sup>1,9\*</sup> & Christoph F. Schmidt<sup>1,10\*</sup>

<sup>1</sup>*Third Institute of Physics—Biophysics, Georg August University, Friedrich-Hund-Platz 1, 37077 Göttingen, Germany*

<sup>2</sup>*Department of Pharmacy - Center for Drug Research, Pharmaceutical Biology, Ludwig-Maximilians University, Butenandtstr. 5-13, 81377 Munich, Germany*

<sup>3</sup>*Department of Biotechnology and Biophysics, Biocenter, University of Würzburg, Am Hubland, 97074 Würzburg, Germany*

<sup>4</sup>*Synthego Corporation, 3565 Haven Ave, Menlo Park, CA 94025, USA*

<sup>5</sup>*Department of Physics, Clarendon Laboratory, University of Oxford, Oxford, UK, OX1 3PU*

<sup>6</sup>*The Kavli Institute for Nanoscience Discovery, University of Oxford, Oxford, UK, OX1 3QU*

<sup>7</sup>*Institute of Pharmacology and Toxicology, University Medical Center Göttingen, Germany*

<sup>8</sup>*Cluster of Excellence “Multiscale Bioimaging: from Molecular Machines to Networks of Excitable Cells” (MBExC), Georg August University, 37077 Göttingen, Germany*

<sup>9</sup>*Experimental Physics I, University of Bayreuth, Universitätsstr. 30, 95440 Bayreuth, Germany*

<sup>10</sup>*Department of Physics and Soft Matter Center, Duke University, Durham, NC 27708, USA*

<sup>†</sup>*Equal contribution first authors.*

*\*Corresponding authors: F.R. [florian.rehfeldt@uni-bayreuth.de](mailto:florian.rehfeldt@uni-bayreuth.de); C.F.S. [cfschmidt@phy.duke.edu](mailto:cfschmidt@phy.duke.edu)*

Table 1: DNA oligos sequence

| DNA oligo strands | Sequence                                         |
|-------------------|--------------------------------------------------|
| F                 | 3' Thiol C3 GCGGGACTTTCGTGCGTCGC Alexa 488 5'    |
| Q                 | 3' Iowa blackFQ CGCGCCCGTGCGCCGAACGC C6 Thiol 5' |
| H                 | GCGAACCG GAGAGTGTTAGAGACA CGGTTCGC               |
| C                 | CTCTCACAATCTCTGTCGGTTCGC                         |

Table 2: DNA sensor crosslinking concentration

| Network                        | $R$   | Sensor concentration ( $\mu\text{M}$ ) |
|--------------------------------|-------|----------------------------------------|
| Actin <sup>a</sup>             | 0     | 0                                      |
| Actin <sup>a</sup> +DNA sensor | 0.005 | 0.12                                   |
|                                | 0.01  | 0.24                                   |
|                                | 0.02  | 0.48                                   |
|                                | 0.1   | 2.4                                    |
|                                | 0.2   | 4.7                                    |

<sup>a</sup> A fixed actin concentration of 23.81  $\mu\text{M}$  was always used;

Table 3: Buffer compositions

| Buffer types      | Composition                                                     |
|-------------------|-----------------------------------------------------------------|
| DNA hybridization | 50 mM NaCl, 10mM MgCl <sub>2</sub> , 1x PBS                     |
| Actin buffer      | 1M KCl, 0.1M imidazole pH 7.4, 10mM ATP, 20mM MgCl <sub>2</sub> |

| Closed sensor           | $\tau$ [ns] DNA hybridization buffer | $\tau$ [ns] actin buffer |
|-------------------------|--------------------------------------|--------------------------|
| <b>F:H:Q (2:2:2)</b>    | $0.62 \pm 0.04$ [0.25]               | $0.80 \pm 0.08$ [0.22]   |
|                         | $3.70 \pm 0.07$ [0.75]               | $3.58 \pm 0.07$ [0.78]   |
| <b>F:H:Q (1:2:2)</b>    | $0.53 \pm 0.04$ [0.36]               | $0.59 \pm 0.02$ [0.25]   |
|                         | $3.70 \pm 0.06$ [0.64]               | $3.58 \pm 0.07$ [0.75]   |
| <b>F:H:Q (0.5:2:2)</b>  | $0.53 \pm 0.08$ [0.38]               | $0.59 \pm 0.04$ [0.29]   |
|                         | $3.70 \pm 0.07$ [0.62]               | $3.58 \pm 0.05$ [0.71]   |
| <b>F:H:Q (0.25:2:2)</b> | $0.51 \pm 0.08$ [0.43]               | $0.61 \pm 0.05$ [0.29]   |
|                         | $3.70 \pm 0.08$ [0.57]               | $3.58 \pm 0.05$ [0.71]   |

Table 4: Fluorescence lifetime values (in ns) and their relative fit amplitudes

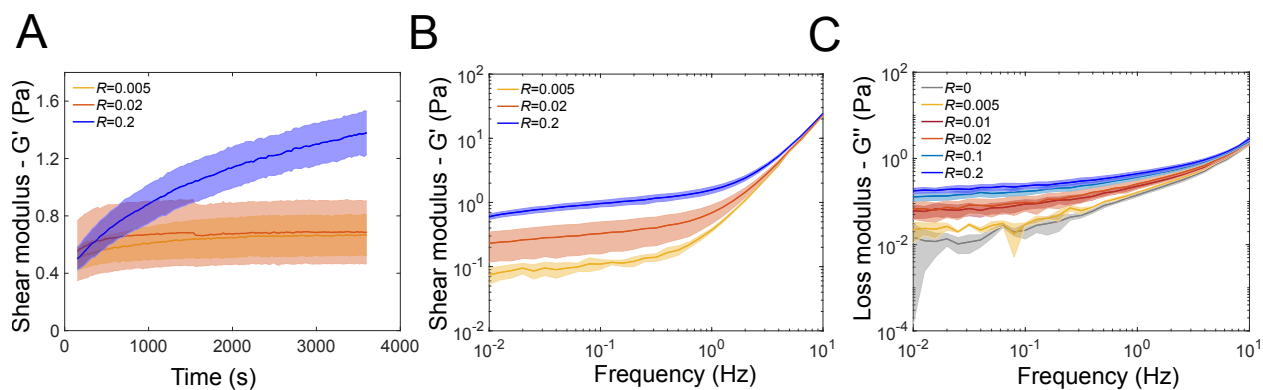

Figure 1: Gelation kinetics and frequency response of actin, actin-DNA sensors networks at different sensor concentrations. A,B,C. Gelation kinetics for sensor concentrations ( $R = 0.005, 0.02, 0.2$ ) to show the evidence of a crosslinked network. Frequency response from these networks also do not exhibit any distinctive frequency dependent behavior. Solid lines represent mean values and the shaded area the standard error of mean.

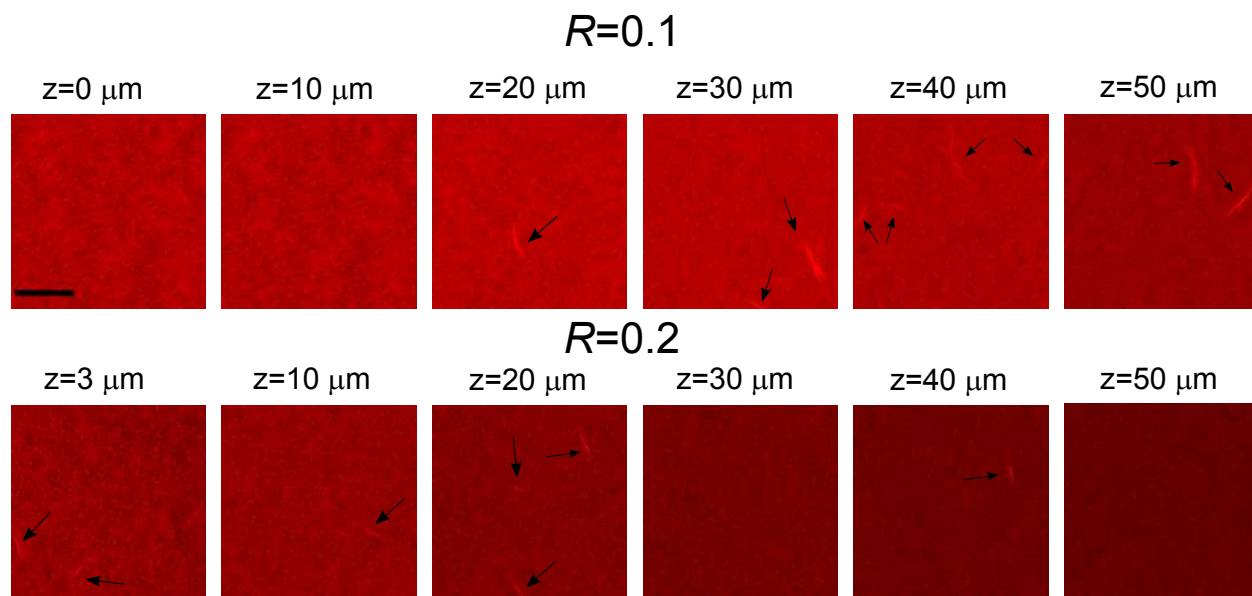

Figure 2: Microstructure of  $R = 0.1$  &  $R = 0.2$  actin-DNA sensor networks at varying  $z$ -heights in the network. Actin-sensor networks at high sensor concentrations ( $R = 0.1, 0.2$ ) were imaged in a confocal  $z$ -scan which shows the existence of bundles across different  $z$ -positions. They appeared mostly in the middle of the network and were not present at the boundary surfaces of the coverslip and the microscopic slide. (Scale bar:  $30 \mu\text{m}$ ). Actin is labeled for fluorescence with Atto 647N.

## DNA Sensor Transfection

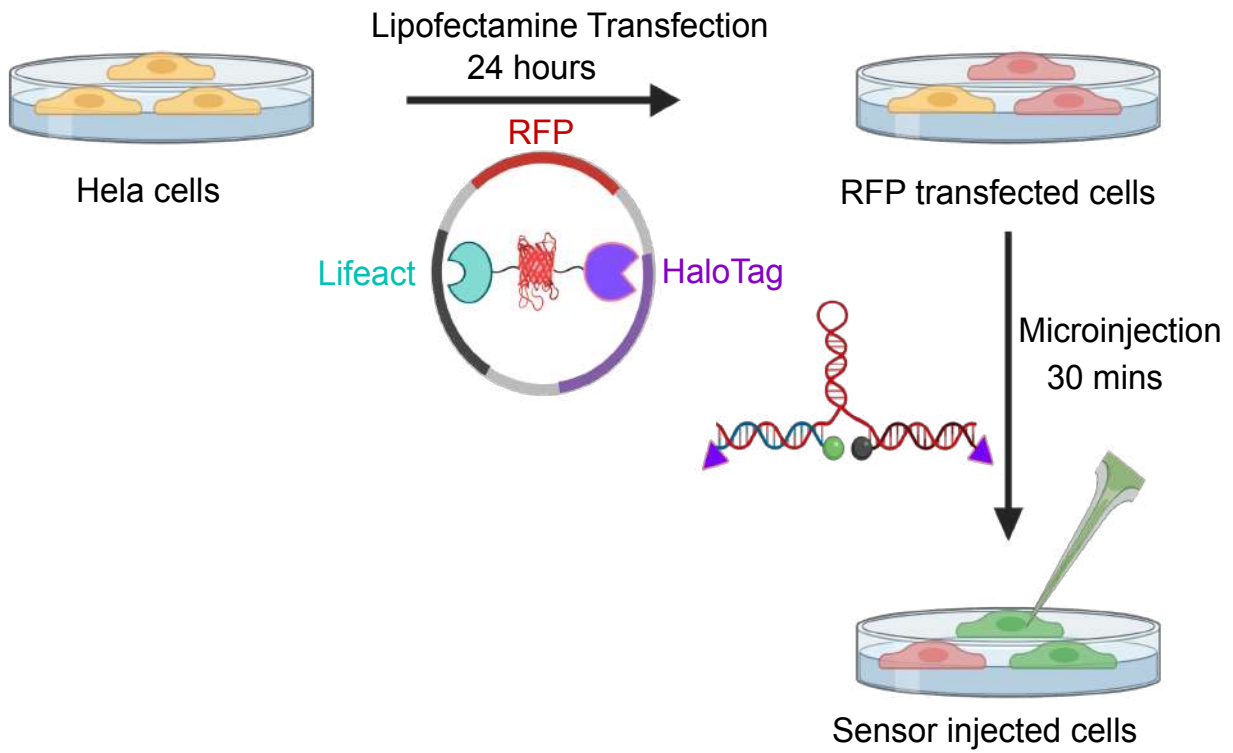

Figure 3: A schematic representation of the transfection protocol of DNA sensors. DNA sensors were transfected into HeLa cells in 2 steps. The lifeact-RFP-HaloTag® plasmid was transfected into HeLa cells with lipofectamine 3000. 24h later, a 50 nM solution of DNA sensors that were first modified, were assembled *in vitro* and microinjected near the nucleus. (Scheme is not drawn to scale.)

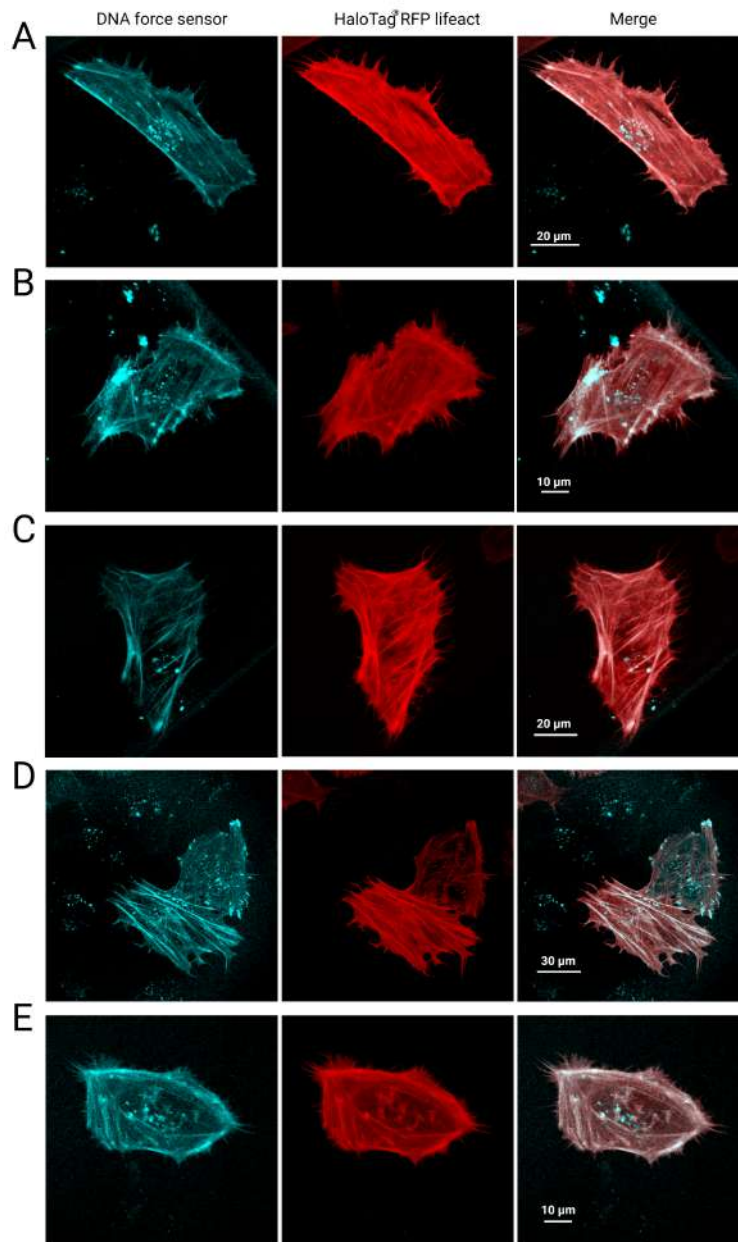

Figure 4: **A - E** HeLa cells microinjected with closed DNA sensors. Confocal micrographs of cells false-coloured for fluorescence intensity. Images corresponding to Alexa 488-tagged closed DNA sensor recorded in the DNA force sensor spectral channel (left), the same cell in RFP spectral channel (middle) and the overlay between both channels (right) confirms co-localization between DNA-sensors and actin.

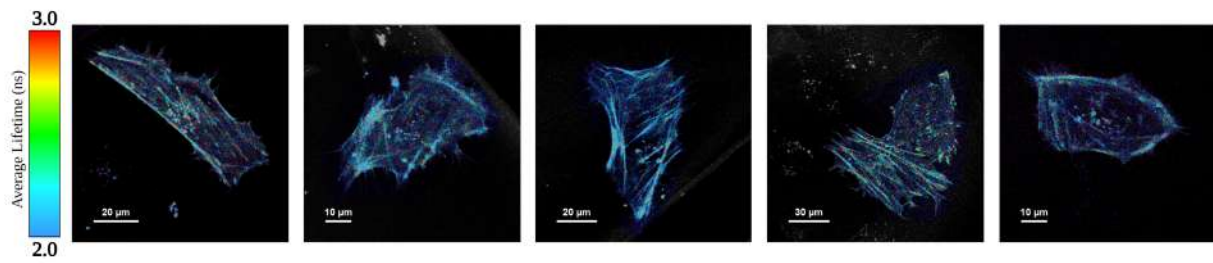

Figure 5: FLIM images of HeLa cells microinjected with DNA sensors.
